# Supplementary material for: Experimental and theoretical charge density assessments for the 4-perfluoropyridyl- and 4-perflurophenyl-1,2,3,5-dithiadiazolyl radicals
Source: Royal Society of Chemistry journal article supplement (doi:10.1039/c6ce01095d), 2016-01-01
Supplement: c6ce01095d1.pdf [file c6ce01095d1.pdf]

## Electronic Supplementary Information

### Experimental and theoretical charge density assessments for the 4-perfluoropyridyl- and 4-perfluorophenyl-1,2,3,5-dithiadiazolyl radicals

Sławomir Domagała\*<sup>a</sup> and Delia. A. Haynes<sup>b</sup>

<sup>a</sup> Biological and Chemical Research Centre, Chemistry Department, University of Warsaw, Żwirki i Wigury 101, 02-089 Warszawa, Poland.  
E-mail: slawdom@chem.uw.edu.pl

<sup>b</sup> Department of Chemistry and Polymer Science, Stellenbosch University, P. Bag X1, Matieland, Stellenbosch, 7602, Republic of South Africa.

**Table S1** Refined parameters in the experimental and theoretical multipolar model for the NF-radical.

| parameter                                                      | Experimental                                          | Theoretical                           |
|----------------------------------------------------------------|-------------------------------------------------------|---------------------------------------|
| Resolution cutoff 1.137 Å <sup>-1</sup>                        | 1                                                     | 1                                     |
| Hexadecapolar level on S atoms                                 | 1                                                     | 1                                     |
| Octupolar level on remaining non-H atoms                       | 1                                                     | 1                                     |
| □' for S                                                       | Fixed at average 1.114 from initial theoretical model | Refined freely for all sulphur atoms  |
| □' for F                                                       | Fixed at average 1.136 from initial theoretical model | Refined freely for all fluorine atoms |
| Anharmonicity of 3 <sup>rd</sup> order for S atoms             | 1                                                     | -                                     |
| Symmetry and equivalence constraints on some multipolar values | 1                                                     | 0                                     |
| Kappa equivalence constraints                                  | 1                                                     | 0                                     |

**Table S2** Refined parameters in the experimental and theoretical multipolar model for the F-radical.

| parameter                                | Experimental                                          | Theoretical                          |
|------------------------------------------|-------------------------------------------------------|--------------------------------------|
| Resolution cutoff 1.137 Å <sup>-1</sup>  | 1                                                     | 1                                    |
| Hexadecapolar level on S atoms           | 1                                                     | 1                                    |
| Octupolar level on remaining non-H atoms | 1                                                     | 1                                    |
| □' for S                                 | Fixed at average 1.116 from initial theoretical model | Refined freely for all sulphur atoms |

| $\rho'$ for F                                                  | Fixed at average 1.130 from initial theoretical model | Refined freely for all fluorine atoms |
|----------------------------------------------------------------|-------------------------------------------------------|---------------------------------------|
| Anharmonicity of 3 <sup>rd</sup> order for S atoms             | 1                                                     | -                                     |
| Symmetry and equivalence constraints on some multipolar values | 1                                                     | 0                                     |
| Kappa equivalence constraints                                  | 1                                                     | 0                                     |

**Table S3** BCP properties for the intermolecular interactions within radical dimer of NF-radical. See Figure 5 for the BCPs locations.

| NF-radical | Interaction | Experimental                     |                                        | Theoretical                      |                                        |
|------------|-------------|----------------------------------|----------------------------------------|----------------------------------|----------------------------------------|
|            |             | $\rho(r)$ [ $e\text{\AA}^{-3}$ ] | $\rho^2\rho(r)$ [ $e\text{\AA}^{-5}$ ] | $\rho(r)$ [ $e\text{\AA}^{-3}$ ] | $\rho^2\rho(r)$ [ $e\text{\AA}^{-5}$ ] |
| Cp1        | S1 ... S2   | 0.166                            | 1.12                                   | 0.156                            | 1.11                                   |
| Cp2        | C1 ... C1   | 0.035                            | 0.40                                   | -                                | -                                      |
| Cp3        | C6 ... C6   | 0.055                            | 0.59                                   | 0.053                            | 0.58                                   |
| Cp4        | F1 ... N1   | -                                | -                                      | 0.076                            | 1.44                                   |
| Cp5        | F4 ... N2   | -                                | -                                      | 0.078                            | 1.46                                   |

**Table S4** BCP properties for intermolecular interactions within radical dimer of F-radical. See Figure 5 for the BCPs locations.

| F-radical | Interaction | Experimental                     |                                        | Theoretical                      |                                        |
|-----------|-------------|----------------------------------|----------------------------------------|----------------------------------|----------------------------------------|
|           |             | $\rho(r)$ [ $e\text{\AA}^{-3}$ ] | $\rho^2\rho(r)$ [ $e\text{\AA}^{-5}$ ] | $\rho(r)$ [ $e\text{\AA}^{-3}$ ] | $\rho^2\rho(r)$ [ $e\text{\AA}^{-5}$ ] |
| Cp1       | S1 ... S2   | 0.149                            | 1.22                                   | 0.167                            | 1.18                                   |
| Cp2       | F1 ... N1   | 0.063                            | 1.22                                   | 0.067                            | 1.31                                   |
| Cp3       | F5 ... N2   | 0.074                            | 1.39                                   | 0.077                            | 1.47                                   |
| Cp4       | C3 ... C3   | 0.053                            | 0.57                                   | 0.049                            | 0.58                                   |
| Cp5       | F1 ... C2   | -                                | -                                      | 0.042                            | 0.59                                   |

**Table S5** Electron density  $\rho(r)$  [ $e\text{\AA}^{-3}$ ] and laplacian,  $\rho^2\rho(r)$  [ $e\text{\AA}^{-5}$ ] in NF-radical for noncovalent interactions.

| Interaction (ORTEP code) | Experimental |             | Theoretical |             |
|--------------------------|--------------|-------------|-------------|-------------|
|                          | $\rho(r)$    | $\rho^2(r)$ | $\rho(r)$   | $\rho^2(r)$ |
| S2 ... N1 (56552)        | 0.035        | 0.39        | 0.035       | 0.38        |
| N2 ... S1 (56552)        | 0.036        | 0.40        | 0.036       | 0.40        |
| N3 ... S1 (54501)        | 0.049        | 0.55        | 0.055       | 0.59        |
| N3 ... S2 (54501)        | 0.052        | 0.58        | 0.058       | 0.62        |
| S2 ... F1 (56552)        | 0.040        | 0.60        | 0.039       | 0.59        |
| F3 ... S2 (54501)        | 0.044        | 0.58        | 0.044       | 0.60        |
| F4 ... S1 (56552)        | 0.054        | 0.83        | 0.051       | 0.80        |
| F1 ... F3 (55452)        | 0.038        | 0.68        | 0.036       | 0.69        |
| F2 ... F3 (55452)        | 0.045        | 0.84        | 0.045       | 0.85        |
| F3 ... F3 (65751)        | 0.029        | 0.60        | 0.029       | 0.61        |
| F3 ... F4 (65751)        | 0.050        | 1.05        | 0.050       | 1.06        |

**Table S6** Electron density  $\rho(r)$  [ $e\text{\AA}^{-3}$ ] and laplacian,  $\rho^2(r)$  [ $e\text{\AA}^{-5}$ ] in F-radical for noncovalent interactions.

| Interaction (ORTEP code) | Experimental |             | Theoretical |             |
|--------------------------|--------------|-------------|-------------|-------------|
|                          | $\rho(r)$    | $\rho^2(r)$ | $\rho(r)$   | $\rho^2(r)$ |
| S2 ... N1 (56552)        | 0.056        | 0.57        | 0.064       | 0.66        |
| N2 ... S1 (56552)        | 0.058        | 0.57        | 0.065       | 0.66        |
| S1 ... F5 (56552)        | 0.036        | 0.58        | 0.039       | 0.59        |
| S2 ... F5 (54504)        | 0.015        | 0.24        | 0.016       | 0.24        |
| S2 ... F1 (56552)        | 0.033        | 0.61        | 0.037       | 0.60        |
| F3 ... S1 (54501)        | -            | -           | 0.057       | 0.77        |
| F3 ... S2 (54501)        | 0.057        | 0.79        | 0.067       | 0.86        |
| F4 ... N2 (54504)        | 0.039        | 0.65        | 0.041       | 0.67        |
| F1 ... F2 (65551)        | 0.023        | 0.47        | 0.022       | 0.47        |
| F2 ... F2 (65551)        | 0.034        | 0.70        | 0.034       | 0.71        |
| F3 ... F5 (54504)        | 0.012        | 0.23        | 0.012       | 0.23        |

|                   |       |      |       |      |
|-------------------|-------|------|-------|------|
| F4 ... F5 (54504) | 0.036 | 0.75 | 0.036 | 0.75 |
|-------------------|-------|------|-------|------|

**Table S7** Electron density  $\rho(r)$  [ $\text{e}\text{\AA}^{-3}$ ] and laplacian,  $\nabla^2\rho(r)$  [ $\text{e}\text{\AA}^{-5}$ ] values for the covalent bonds in the dithiadiazolyl ring obtained from the final experimental and theoretical model.

| Bond  | NF-radical   |                   |             |                   | F-radical    |                   |             |                   |
|-------|--------------|-------------------|-------------|-------------------|--------------|-------------------|-------------|-------------------|
|       | Experimental |                   | Theoretical |                   | Experimental |                   | Theoretical |                   |
|       | $\rho(r)$    | $\nabla^2\rho(r)$ | $\rho(r)$   | $\nabla^2\rho(r)$ | $\rho(r)$    | $\nabla^2\rho(r)$ | $\rho(r)$   | $\nabla^2\rho(r)$ |
| S1-S2 | 0.957        | -2.42             | 0.937       | -1.920            | 0.875        | -1.02             | 0.914       | -1.43             |
| S1-N1 | 1.578        | -8.21             | 1.505       | -7.770            | 1.567        | -4.42             | 1.463       | -5.94             |
| S2-N2 | 1.579        | -8.24             | 1.507       | -7.750            | 1.576        | -4.54             | 1.471       | -6.09             |
| N1-C1 | 2.380        | -21.36            | 2.324       | -20.960           | 2.336        | -21.92            | 2.292       | -20.18            |
| N2-C1 | 2.372        | -21.03            | 2.317       | -20.810           | 2.338        | -22.03            | 2.295       | -20.21            |

**Table S8** Deformation density statistics on 3D grids

|                                  | NF-radical   |             | F-radical    |             |
|----------------------------------|--------------|-------------|--------------|-------------|
|                                  | Experimental | Theoretical | Experimental | Theoretical |
| $\rho_{\text{max}}$              | 0.933        | 1.060       | 0.894        | 1.084       |
| $\rho_{\text{min}}$              | -1.360       | -2.230      | -1.071       | -2.178      |
| $\rho$                           | 1.7E-07      | 2.9E-07     | 1.4E-06      | 9.2E-07     |
| $\rho_{\text{max}}^{\text{max}}$ | 0.038        | 0.041       | 0.039        | 0.041       |
| RMS                              | 0.038        | 0.041       | 0.039        | 0.041       |
| RMSD                             | <b>0.016</b> |             | <b>0.021</b> |             |
| Correlation $R$                  | <b>0.925</b> |             | <b>0.868</b> |             |

**Table S9** Interaction energies,  $E_{\text{int}}$ , and its components,  $E_{\text{vdW}}$  and  $E_{\text{SOMO-SOMO}}$  [kJ/mol]

| Dimer      | Experimental / 6-31G** |                  |                        | Experimental / 6-311++G** |                  |                        |
|------------|------------------------|------------------|------------------------|---------------------------|------------------|------------------------|
|            | $E_{\text{int}}$       | $E_{\text{vdW}}$ | $E_{\text{SOMO-SOMO}}$ | $E_{\text{int}}$          | $E_{\text{vdW}}$ | $E_{\text{SOMO-SOMO}}$ |
| NF-radical | -46.8                  | 32.6             | -79.4                  | -47.2                     | 34.5             | -81.7                  |
| F-radical  | -46.9                  | 37.4             | -84.3                  | -48.6                     | 38.1             | -86.7                  |

**Table S10** Electrostatic interaction energies [kJ/mol] for NF-radical.

| Symmetry                | Experimental | Theoretical |
|-------------------------|--------------|-------------|
| X ; Y-1 ; Z             | -9.0         | -23.0       |
| X ; -Y ; Z-1/2          | -9.7         | -8.4        |
| X ; -Y ; Z+1/2          | -8.6         | -7.5        |
| X ; -Y+1 ; Z-1/2        | -11.8        | -19.1       |
| X ; Y+1 ; Z             | -9.3         | -23.6       |
| X ; -Y+1 ; Z+1/2        | -11.4        | -18.8       |
| -X+1 ; Y-1 ; -Z+3/2     | 0.4          | -4.3        |
| -X+1 ; Y ; -Z+3/2       | -76.3        | -61.4       |
| -X+1 ; -Y+1 ; -Z+1      | -0.4         | -3.0        |
| -X+1 ; Y+1 ; -Z+3/2     | 0.5          | -4.2        |
| -X+1 ; -Y+1 ; -Z+2      | -1.4         | -6.5        |
| -X+3/2 ; Y-1/2 ; -Z+3/2 | -3.0         | -0.8        |
| -X+3/2 ; Y+1/2 ; -Z+3/2 | -3.3         | -0.6        |
| -X+3/2 ; -Y+1/2 ; -Z+2  | -21.1        | -29.5       |
| <b>RMSD</b>             | <b>8.0</b>   |             |
| <b>Correlation R</b>    | <b>0.927</b> |             |

**Table S11** Electrostatic interaction energies [kJ/mol] for F-radical.

| Symmetry         | Experimental | Theoretical |
|------------------|--------------|-------------|
| X ; Y-1 ; Z      | -23.9        | -16.2       |
| X ; -Y ; Z-1/2   | -7.9         | -8.1        |
| X ; -Y ; Z+1/2   | -7.3         | -8.1        |
| X ; -Y+1 ; Z-1/2 | -24.7        | -23.8       |
| X ; Y+1 ; Z      | -23.9        | -15.8       |
| X ; -Y+1 ; Z+1/2 | -24.9        | -24.2       |

|                         |              |       |
|-------------------------|--------------|-------|
| -X+1 ; Y-1 ; -Z+1/2     | -8.2         | -2.4  |
| -X+1 ; -Y ; -Z          | 7.6          | 1.6   |
| -X+1 ; Y ; -Z+1/2       | -26.4        | -69.8 |
| -X+1 ; -Y+1 ; -Z        | -9.9         | -5.2  |
| -X+1 ; Y+1 ; -Z+1/2     | -8.3         | -2.5  |
| -X+1 ; -Y+1 ; -Z+1      | -2.3         | -3.1  |
| -X+1/2 ; -Y-1/2 ; -Z    | 5.2          | 0.7   |
| -X+1/2 ; Y-1/2 ; -Z+1/2 | -4.7         | -3.2  |
| -X+1/2 ; -Y+1/2 ; -Z    | -30.5        | -24.5 |
| -X+1/2 ; Y+1/2 ; -Z+1/2 | -4.4         | -3.0  |
| RMSD                    | <b>12</b>    |       |
| Correlation <i>R</i>    | <b>0.729</b> |       |

**Table S12** Dipole moments [D] for dimers as obtained from multipolar models and quantum calculations using DFT method with B97D functional and 6-311++G\*\* basis set. The same experimental geometry was used.

| Model                         | NF-radical | F-radical |
|-------------------------------|------------|-----------|
| Experimental multipolar model | 1.68       | 20.23     |
| Theoretical multipolar model  | 11.87      | 9.99      |
| Quantum calculations          | 7.19       | 4.46      |

**Table S13** AIM charges for NF-radical.

| atom | Experimental |                          | Theoretical |                          |
|------|--------------|--------------------------|-------------|--------------------------|
|      | Q [e]        | Volume [Å <sup>3</sup> ] | Q [e]       | Volume [Å <sup>3</sup> ] |
| S1   | 0.449        | 24.516                   | 0.614       | 24.192                   |
| S2   | 0.453        | 23.593                   | 0.606       | 23.303                   |
| N1   | -0.805       | 15.105                   | -0.934      | 15.473                   |
| N2   | -0.805       | 14.061                   | -0.952      | 14.438                   |
| C1   | 0.773        | 7.237                    | 0.803       | 7.017                    |

|                      |               |              |               |         |
|----------------------|---------------|--------------|---------------|---------|
| C2                   | 0.074         | 9.292        | 0.062         | 9.070   |
| C3                   | 0.539         | 8.024        | 0.524         | 8.046   |
| C4                   | 1.011         | 6.489        | 0.922         | 6.675   |
| N3                   | -0.730        | 15.075       | -0.928        | 15.530  |
| C5                   | 1.001         | 6.848        | 0.892         | 7.059   |
| C6                   | 0.530         | 8.180        | 0.501         | 8.266   |
| F1                   | -0.654        | 15.158       | -0.520        | 14.958  |
| F2                   | -0.592        | 14.610       | -0.529        | 14.454  |
| F3                   | -0.585        | 14.416       | -0.530        | 14.293  |
| F4                   | -0.652        | 14.386       | -0.528        | 14.202  |
| Dithiadiazolyl-ring  | <b>0.064</b>  | 84.513       | <b>0.137</b>  | 84.423  |
| 6-membered ring      | <b>-0.059</b> | 112.479      | <b>-0.134</b> | 112.554 |
| Total                | <b>0.005</b>  | 196.991      | <b>0.003</b>  | 196.978 |
| RMSD                 | <b>0.113</b>  | <b>0.258</b> |               |         |
| Correlation <i>R</i> | <b>0.987</b>  | <b>0.999</b> |               |         |

**Table S14** AIM charges for F-radical.

| atom | Experimental |                          | Theoretical |                          |
|------|--------------|--------------------------|-------------|--------------------------|
|      | Q [e]        | Volume [Å <sup>3</sup> ] | Q [e]       | Volume [Å <sup>3</sup> ] |
| S1   | 0.491        | 23.746                   | 0.594       | 24.130                   |
| S2   | 0.496        | 23.349                   | 0.616       | 23.621                   |
| N1   | -0.757       | 13.870                   | -0.953      | 14.127                   |
| N2   | -0.755       | 14.311                   | -0.941      | 14.502                   |
| C1   | 0.922        | 7.038                    | 0.797       | 7.106                    |
| C2   | 0.270        | 8.686                    | 0.054       | 9.368                    |
| C3   | 0.509        | 8.443                    | 0.484       | 8.365                    |
| C4   | 0.516        | 8.195                    | 0.470       | 8.258                    |
| C5   | 0.649        | 8.238                    | 0.477       | 8.889                    |

|                     |               |              |               |         |
|---------------------|---------------|--------------|---------------|---------|
| C6                  | 0.524         | 8.092        | 0.515         | 8.018   |
| C7                  | 0.517         | 8.628        | 0.509         | 8.495   |
| F1                  | -0.707        | 16.282       | -0.520        | 15.772  |
| F2                  | -0.663        | 16.334       | -0.516        | 16.036  |
| F4                  | -0.677        | 14.884       | -0.524        | 14.537  |
| F5                  | -0.709        | 16.950       | -0.513        | 16.410  |
| F3                  | -0.620        | 18.000       | -0.544        | 17.512  |
| Dithiadiazolyl-ring | <b>0.397</b>  | 82.315       | <b>0.113</b>  | 83.486  |
| 6-membered ring     | <b>-0.390</b> | 132.732      | <b>-0.108</b> | 131.660 |
| Total               | <b>0.007</b>  | 215.047      | <b>0.005</b>  | 215.145 |
| RMSD                | <b>0.141</b>  | <b>0.375</b> |               |         |
| Correlation $R$     | <b>0.975</b>  | <b>0.998</b> |               |         |

**Table S15** Electrostatic Potential quantities computed at the Hirshfeld surface. The quantities:  $V_{S,\max}$ ,  $V_{S,\min}$ ,

$\bar{V}_S^\square$ ,  $\bar{V}_S^\square$ ,  $\bar{V}_S$  and  $\square$  are given in e/Å;  $\square_\square^2$ ,  $\square_\square^2$  and  $\square_{\text{tot}}^2$  are in (e/Å)<sup>2</sup>;  $\square$  is dimensionless.

| Surface quantity         | NF-radical   |             | F-radical    |             |
|--------------------------|--------------|-------------|--------------|-------------|
|                          | Experimental | Theoretical | Experimental | Theoretical |
| $V_{S,\max}$             | 0.1406       | 0.1929      | 0.2544       | 0.2038      |
| $V_{S,\min}$             | -0.0686      | -0.1034     | -0.0930      | -0.0758     |
| $\bar{V}_S^\square$      | 0.0326       | 0.0544      | 0.0836       | 0.0479      |
| $\bar{V}_S^\square$      | -0.0250      | -0.0352     | -0.0538      | -0.0305     |
| $\bar{V}_S$              | 0.0146       | 0.0165      | 0.0205       | 0.0151      |
| $\square$                | 0.0268       | 0.0448      | 0.0699       | 0.0392      |
| $\square_\square^2$      | 0.0005       | 0.0013      | 0.0021       | 0.0011      |
| $\square_\square^2$      | 0.0003       | 0.0004      | 0.0007       | 0.0002      |
| $\square_{\text{tot}}^2$ | 0.0008       | 0.0016      | 0.0028       | 0.0013      |



|                      |               |        |               |        |
|----------------------|---------------|--------|---------------|--------|
| $\sigma$             | 0.2218        | 0.1695 | 0.1873        | 0.1427 |
| RMSD                 | <b>0.0367</b> |        | <b>0.0452</b> |        |
| Correlation <i>R</i> | <b>0.733</b>  |        | <b>0.861</b>  |        |

**Table S16** Total atomic spins [au] for the NF-radical molecule in its crystal lattice obtained from periodic calculations using Crystal09 and the DFT method in UB3LYP\6-31G\*\*. The symmetry related molecules have opposite spins, and total spin is summed to zero.

| Atom                    | Spin   |
|-------------------------|--------|
| S1                      | 0.147  |
| S2                      | 0.144  |
| N1                      | 0.127  |
| N2                      | 0.129  |
| C1                      | -0.060 |
| C2                      | 0.010  |
| C3                      | -0.008 |
| C4                      | 0.003  |
| N3                      | -0.006 |
| C5                      | 0.004  |
| C6                      | -0.008 |
| F1                      | 0.000  |
| F2                      | 0.000  |
| F3                      | 0.000  |
| F4                      | 0.000  |
| Dithiadiazolyl ring     | 0.487  |
| 4-perfluoropyridyl ring | -0.005 |
| Total                   | 0.482  |

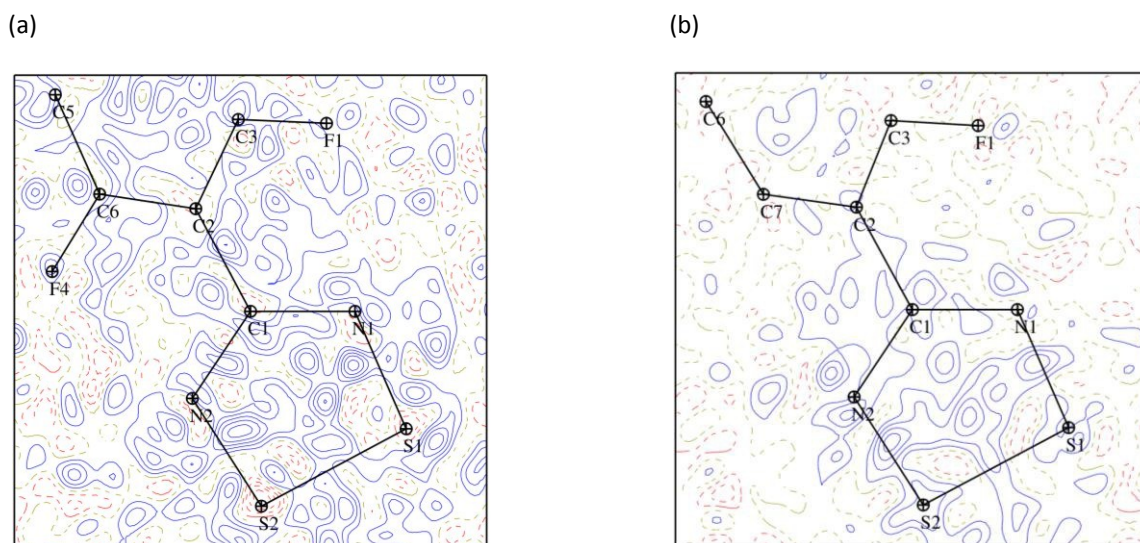

**Figure S1** Residual density maps for the NF-radical (a) and F-radical (b) at the full resolution up to  $1.137 \text{ \AA}^{-1}$ . The contour lines are displayed with step  $\pm 0.05 \text{ e}\text{\AA}^{-3}$ . The maximum peak are equal  $+0.28$  and  $+0.23 \text{ e}\text{\AA}^{-3}$ , for NF-radical and F-radical, respectively. The deepest holes are equal  $-0.24$  and  $-0.14 \text{ e}\text{\AA}^{-3}$  for NF-radical and F-radical, respectively.

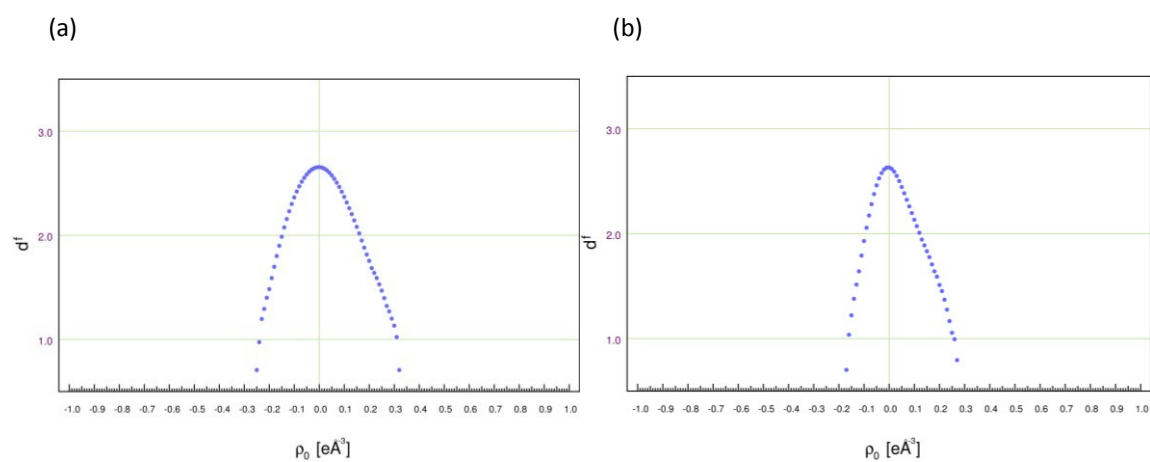

**Figure S2** Fractal residual maps for the NF-radical (a) and F-radical (b).

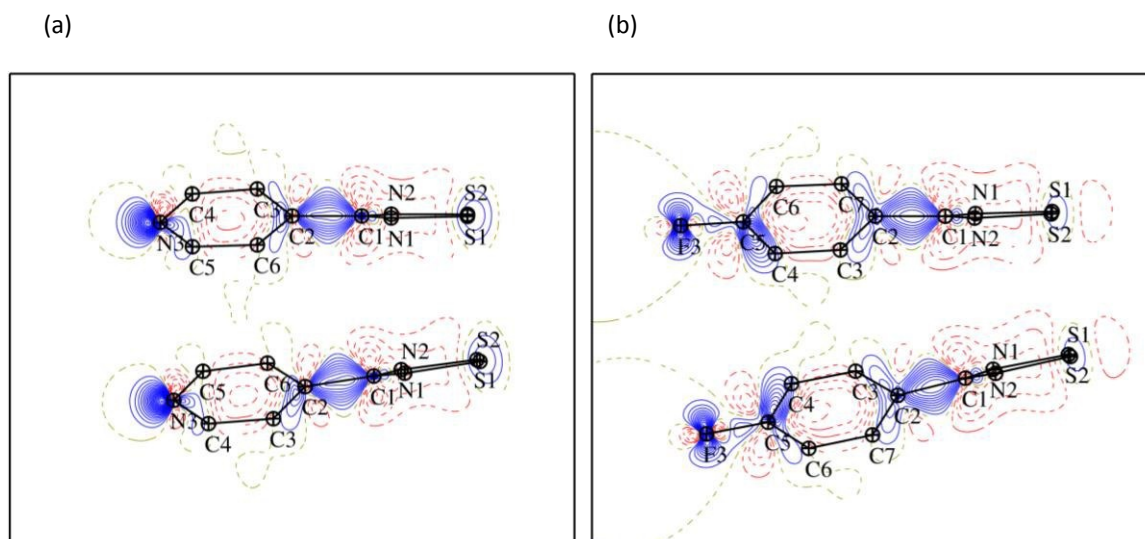

**Figure S3** Deformation density maps in dimers of (a) NF-radical and (b) F-radical. Maps are shown in the plane of the C1 and the C2 atom of the first molecule and the C2 atom of the second molecule. Contour level:  $\pm 0.05 \text{ e}\text{\AA}^{-3}$ . Blue solid lines and red dashed lines denote positive and negative contours, respectively.

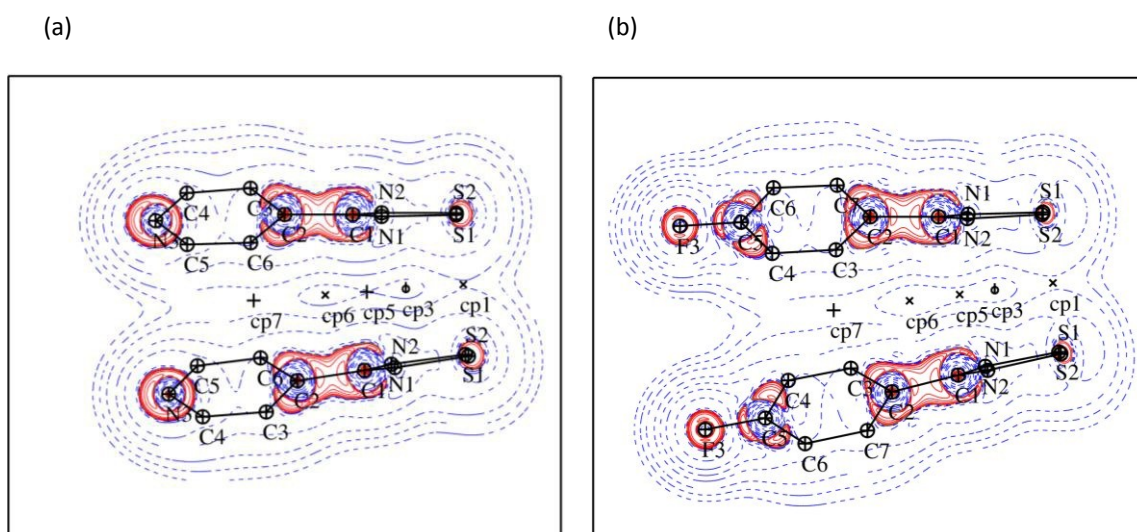

**Figure S4** Laplacian maps in dimers (a) NF-radical and (b) F-radical. Maps are shown in the plane of the C1 and the C2 atom of the first molecule and the C2 atom of the second molecule. Blue (dashed) and red (solid) lines represent positive and negative values. Contours are drawn at  $\pm 2^m \times 10^n \text{ e}\text{\AA}^{-5}$  ( $m = 1, 2, 3$ ;  $n = -1, 0, 1, 2$ ) levels. The '+', 'x' and  $\phi$  symbols denote the bond, ring and the cage critical points, respectively.

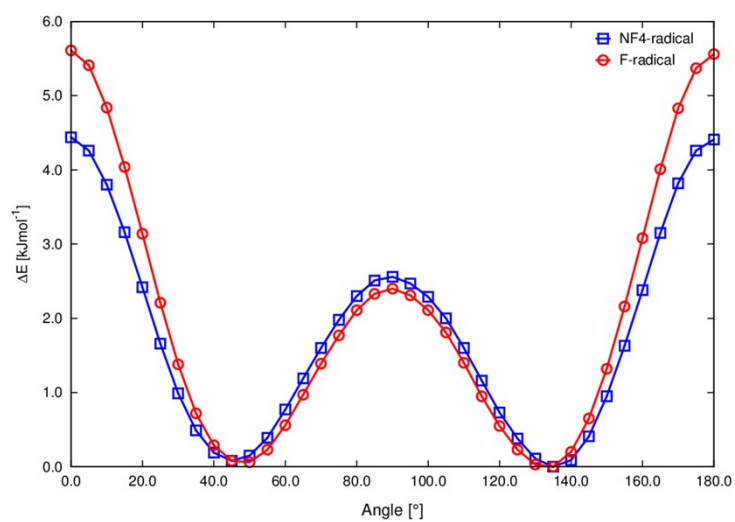

**Figure S5** Relaxed potential energy scan around torsion angle between 5-membered ring and 6-membered ring for NF-radical and F-radical monomer. The DFT method was used with UB3LYP functional and 6-31G\*\* basis set.
